# Supplementary material for: Anti-Cancer Effect of Cordycepin on FGF9-Induced Testicular Tumorigenesis
Source: MDPI journal article supplement (doi:10.3390/ijms21218336), 2020-11-06
Supplement: s1 [file s1]

**Table S1.** Chemicals and materials used in this study.

| <b>Chemical / Material.</b>                                        | <b>Manufacturer<sup>a</sup></b>       | <b>Catalogue No.</b> |
|--------------------------------------------------------------------|---------------------------------------|----------------------|
| 2-ME (2-Mercaptoethanol)                                           | Alfa Aesar / Thermo Fisher Scientific | A15890               |
| Acrylamide/Bis-acrylamide, 30% solution                            | Sigma-Aldrich                         | A3574-100ML          |
| Agar                                                               | BD                                    | 214530               |
| Agarose                                                            | GeneDirex                             | MB755-0100           |
| Bovine serum albumin (BSA)                                         | UniRegion BioTech                     | UR-BSA001-100G       |
| Citric Acid                                                        | J.T. Baker/Avantor                    | 0122-01              |
| Cordycepin                                                         | Sigma-Aldrich                         | C3394-25MG           |
| DAB (Mouse/Rabbit Probe HRP Labeling Kit)                          | BioTnA                                | TAHC03D-100          |
| DMEM/F12                                                           |                                       |                      |
| Dulbecco's modified eagle medium/ nutrient mixture F-12            | Gibco / Thermo Fisher Scientific      | 12400-024            |
| DMSO                                                               | Sigma-Aldrich                         | D4540-500ML          |
| DPX Mountant for histology                                         | Sigma-Aldrich                         | 06522-100ML          |
| ECL detection kit (Immunobilon® chemiluminescent HRP substrate)    | Millipore                             | WBKLS0500            |
| EDTA                                                               | Sigma-Aldrich                         | E5134-100G           |
| EGTA                                                               | Merck                                 | L808635342           |
| Ethanol                                                            | J.T. Baker/Avantor                    | 8006-05              |
| Fetal bovine serum (FBS)                                           | Gibco / Thermo Fisher Scientific      | 10437-028            |
| FGF9, human, recombinant                                           | PEPROTech                             | 100-23               |
| Glycine                                                            | J.T. Baker/Avantor                    | 4059-06              |
| Hematoxylin                                                        | Merck                                 | HX68297174           |
| HEPES [4-(2-hydroxyethyl)-1-piperazineethanesulfonic acid]         | Sigma-Aldrich                         | H4034-100G           |
| Hydrochloric acid (HCl)                                            | Merck                                 | K49418617738         |
| LB Broth                                                           | BD                                    | 244620               |
| Magna ChIP™ G Kit                                                  | EMD Millipore                         | MAGNA0002            |
| Methanol                                                           | DUKSAN                                | 62                   |
| MTT [3-(4,5-dimethylthiazol-2-yl)-2,5-diphenyltetrazolium bromide] | Sigma-Aldrich                         | M5655                |
| Paraformaldehyde (PFA)                                             | Merck                                 | 1,04005.1000         |
| PD98059 (MAPK/ERK1/2 inhibitor)                                    | Sigma-Aldrich                         | P215-5MG             |
| Penicillin/Streptomycin                                            | Simply                                | CC502-0100           |
| Potassium chloride (KCl)                                           | Sigma-Aldrich                         | P5405-250G           |
| Potassium dihydrogen phosphate (KH <sub>2</sub> PO <sub>4</sub> )  | Sigma-Aldrich                         | P5655-100G           |
| ProLong® Diamond Antifade Mountant with DAPI                       | Thermo Fisher Scientific              | P36962               |
| Protease Inhibitor Cocktail                                        | Sigma-Aldrich                         | P8340-1ML            |
| Protein Assay Dye                                                  | BioRad Laboratories                   | 5000006              |
| Protein G magnetic Beads (PureProteome™)                           | EMD Millipore                         | LSKMAGG02            |
| Puromycin                                                          | Sigma-Aldrich                         | P8833-100MG          |
| Sodium bicarbonate (NaHCO <sub>3</sub> )                           | Sigma-Aldrich                         | S5761-500G           |
| Disodium hydrogen phosphate (Na <sub>2</sub> HPO <sub>4</sub> )    | Sigma-Aldrich                         | S5136-100G           |

**Table S1** *Cont.*

|                                                                           |                                  |             |
|---------------------------------------------------------------------------|----------------------------------|-------------|
| Sodium azide                                                              | Sigma-Aldrich                    | S2002-100G  |
| Sodium chloride (NaCl)                                                    | Sigma-Aldrich                    | S6191-1KG   |
| Sodium chloride (NaCl)                                                    | J.T. Baker/Avantor               | 3624-05     |
| Sodium dodecyl sulfate (SDS)                                              | SERVA                            | 20765.03    |
| Sodium hydroxide (NaOH)                                                   | Sigma-Aldrich                    | S2770       |
| Sodium orthovanadate                                                      | Sigma-Aldrich                    | S6508       |
| Sodium pyrophosphate                                                      | Riedel-de Haën                   | 30411       |
| TBE buffer (5x)                                                           | UniRegion Bio Tech               | UR-TBEL     |
| Tris base                                                                 | J.T. Baker / Avantor             | 4109-06     |
| Tris HCl                                                                  | J.T. Baker / Avantor             | 4103-02     |
| Triton X-100 (for IHC)                                                    | BDH laboratory Supplies          | 306324N     |
| Triton X-100 (for cell lysate)                                            | GERBU                            | 2000        |
| Trypen blue                                                               | Sigma-Aldrich                    | T8154       |
| Trypsin-EDTA (0.5%, 10x)                                                  | Gibco / Thermo Fisher Scientific | 15400-054   |
| Tween 20                                                                  | PanReac AppliChem                | 123412-1611 |
| Waymouth MB 752/1 medium                                                  | Sigma-Aldrich                    | W1625-1L    |
| Xylene                                                                    | J.T. Baker / Avantor             | 9490-03     |
| PVDF membrane (Polyvinylidene difluoride membrane; 0.45 micron pore size) | PALL Life Science                | BSP0161     |

<sup>a</sup> The headquarters locations of companies: BD (Becton, Dickinson and Company), Franklin Lakes, NJ, USA; BioTnA, Kaohsiung, Taiwan; BDH laboratory Supplies, Kampala, Uganda; DUKSAN, Ansan City, Kyunggi, Korea; GeneDirex, Taichung, Taiwan; Gibco, Grand Island, NY, USA; GERBU Biotechnik GmbH, Heidelberg, Germany; J.T.Baker/Avantor Performance Materials, Center Valley, PA, USA; Merck, Darmstadt, Germany; Millipore, Billerica, MA, USA; EMD Millipore, Billerica, MA, USA; PALL Corporation, Port Washington, NY, USA; PanReac AppliChem, Darmstadt, Germany; PerkinElmer, Waltham, MA, USA; PEPROTech, Rocky Hill, NJ, USA; Riedel-de Haën/Honeywell, Morristown, NJ, USA; Sigma-Aldrich, St. Louis, MO, USA; SERVA Electrophoresis GmbH, Heidelberg, Germany; Thermo Fisher Scientific Inc., Waltham, MA, USA; UniRegion Bio Tech, Taipei, Taiwan.
