# Supplementary material for: Anti-Cancer Effect of Cordycepin on FGF9-Induced Testicular Tumorigenesis
Source: MDPI journal article supplement (doi:10.3390/ijms21218336), 2020-11-06
Supplement: s1 [file s1]

**Table S2.** Antibodies used in this study.

| Antibody                                                        | Manufacturer <sup>a</sup>                | Catalogue No.    | Species/Clonality | Application <sup>b</sup>                |
|-----------------------------------------------------------------|------------------------------------------|------------------|-------------------|-----------------------------------------|
| <b>Primary Antibody</b>                                         |                                          |                  |                   |                                         |
| $\beta$ -actin                                                  | Sigma-Aldrich                            | A5441            | mouse/monoclonal  | WB                                      |
| CDK1                                                            | AbCam                                    | ab18             | mouse/monoclonal  | WB                                      |
| CDK2                                                            | Cell Signaling                           | #2546            | rabbit/monoclonal | WB                                      |
| CDK4                                                            | AbCam                                    | ab137675         | rabbit/monoclonal | WB                                      |
| Cleaved-Caspase 3                                               | Cell Signaling                           | #9661            | rabbit/polyclonal | WB, IHC                                 |
| Cyclin A1                                                       | Proteintech                              | 13295-1-AP       | rabbit/monoclonal | WB                                      |
| Cyclin B1                                                       | Abcam                                    | ab181593         | rabbit/monoclonal | WB                                      |
| Cyclin D1                                                       | Cell Signaling                           | #2978            | rabbit/polyclonal | WB                                      |
| Cyclin E1                                                       | Cell Signaling                           | #20808           | rabbit/polyclonal | WB                                      |
| E2F1                                                            | Abcam                                    | ab179445         | rabbit/monoclonal | WB                                      |
|                                                                 | Abcam                                    | ab112580         | rabbit/polyclonal | IP, ChIP                                |
|                                                                 | Proteintech                              | 12171-1-AP       | rabbit/polyclonal | IHC                                     |
| ERK1/2                                                          | Cell Signaling                           | #9102            | rabbit/polyclonal | WB, IHC                                 |
| Phosphor-ERK1/2                                                 | Cell Signaling                           | #9101            | rabbit/polyclonal | WB                                      |
|                                                                 | Abcam                                    | ab201015         | rabbit/monoclonal | IHC                                     |
| FGF9                                                            | Abcam                                    | ab9743           | rabbit/polyclonal | WB, IHC                                 |
| FGFR1                                                           | Sigma-Aldrich                            | F5421            | rabbit/polyclonal | WB, IF                                  |
| FGFR2                                                           | Sigma-Aldrich                            | F6769            | rabbit/polyclonal | WB                                      |
|                                                                 | Abcam                                    | ab10648          | rabbit/polyclonal | IF                                      |
| FGFR3                                                           | Sigma-Aldrich                            | F3922            | rabbit/polyclonal | WB                                      |
|                                                                 | Abcam                                    | ab180906         | rabbit/polyclonal | IF                                      |
| FGFR4                                                           | Abcam                                    | ab5481           | rabbit/polyclonal | WB, IF                                  |
| IgG                                                             | Jackson                                  | 005-000-003      | goat              | Negative control<br>for all experiments |
|                                                                 | ImmunoResearch                           | 011-000-003      | rabbit            |                                         |
| Ki-67                                                           | Abcam                                    | ab16667          | rabbit/polyclonal | WB, IHC                                 |
| mTOR                                                            | Cell Signaling                           | #2983            | rabbit/polyclonal | WB                                      |
| Phosphor-mTOR                                                   | Cell Signaling                           | #2971            | rabbit/polyclonal | WB                                      |
| p21                                                             | GeneTex                                  | GTX62525         | rabbit/polyclonal | WB                                      |
| Phosphor-p21                                                    | Santa Cruz<br>Biotechnology              | sc-20220-R       | rabbit/polyclonal | WB                                      |
| p27                                                             | Cell Signaling                           | #3698            | rabbit/polyclonal | WB                                      |
| Phosphor-p27                                                    | Cell Signaling                           | #2404            | rabbit/polyclonal | WB                                      |
| p53                                                             | Cell Signaling                           | #2524            | rabbit/polyclonal | WB                                      |
| Phosphor-p53                                                    | Cell Signaling                           | #9284            | rabbit/polyclonal | WB                                      |
| PLC $\gamma$ 1                                                  | Cell Signaling                           | #5690            | rabbit/polyclonal | WB                                      |
| phosphor-PLC $\gamma$ 1                                         | Cell Signaling                           | #2821            | rabbit/polyclonal | WB                                      |
| Rb                                                              | Abcam                                    | Ab181616         | rabbit/monoclonal | WB                                      |
| P-Rb                                                            | Cell Signaling                           | #8516            | rabbit/monoclonal | WB, IHC                                 |
| <b>Secondary Antibody</b>                                       |                                          |                  |                   |                                         |
| Alexa Flour <sup>®</sup> 488-<br>conjugated anti-<br>rabbit IgG | Invitrogen / Thermo<br>Fisher Scientific | A11008           | Donkey            | IF                                      |
| Anti-mouse IgG<br>HRP-conjugated                                | PerkinElmer                              | NEF82200-<br>1EA | Goat              | WB                                      |
| Anti-rabbit IgG HRP-<br>conjugated                              | PerkinElmer                              | NEF81200-<br>1EA | Goat              | WB                                      |

<sup>a</sup> The headquarters locations of companies: Abcam, Cambridge, UK; Cell Signaling, Beverly, MA, USA; GeneTex, Irvine,

CA, USA; Invitrogen, Waltham, MA, USA; Jackson ImmunoResearch, West Grove, PA, USA; PerkinElmer, Waltham, MA, USA; Proteintech, Rosemont, IL, USA ; Santa Cruz Biotechnology, Santa Cruz, CA, USA; Sigma-Aldrich, St. Louis, MO, USA; Thermo Fisher Scientific Inc., Waltham, MA, USA. <sup>b</sup> ChIP: Chromatin Immunoprecipitation; IF, immunofluorescence staining; IP: Immunoprecipitation; IHC, immunohistochemistry staining; WB, western blot analysis; HRP, horseradish peroxidase.
